# Supplementary material for: Neutrophilic Dermatosis in Myelodysplastic Syndrome and Chronic Active Hepatitis C
Source: PubMed Central journal article supplement — J Investig Med High Impact Case Rep. 2021 Jul 31;9:23247096211037458. doi: 10.1177/23247096211037458 (PMC8326609; doi:10.1177/23247096211037458), 2021-07-31
Supplement: sj-pdf-1-hic-10.1177_23247096211037458.pdf [file sj-pdf-1-hic-10.1177_23247096211037458.pdf]

## Appendix 1.0

### **Diagnostic criteria for Sweet syndrome:**

*The presence of both major criteria and two of the four minor criteria*

#### Major criteria:

- 1) Abrupt onset of painful erythematous plaques or nodules
- 2) Histopathologic evidence of a dense neutrophilic infiltrate dermis without evidence of leukocytoclastic vasculitis

#### Minor criteria:

- 1) Association with underlying hematologic or visceral malignancy, inflammatory diseases such as chronic autoimmune disorders, infections or pregnancy, OR preceded by upper respiratory infection, gastrointestinal infection, or vaccination
- 2) Abnormal laboratory values at presentation (three of four of the following):
  - a. Erythrocyte sedimentation rate > 20 mm/hour
  - b. C-reactive protein
  - c. > 8000 leukocytes
  - d. > 70% neutrophils
- 3) Pyrexia > 38°C
- 4) Excellent response to treatment with systemic corticosteroids or potassium iodide
